# Supplementary material
Source: MDPI journal article supplement (https://www.mdpi.com/2073-4433/14/3/607)
Supplement: s1 [file s1]

# Supplementary Materials:

Isaac Kwesi Nooni<sup>1</sup>, Faustin Katchele Ogou<sup>2</sup>, Abdoul Aziz Saidou Chaibou<sup>3</sup>, Francis Mawuli Nakoty<sup>4</sup>, Gnim Tchalim Gnitou<sup>5</sup> and Jiao Lu<sup>1,\*</sup>

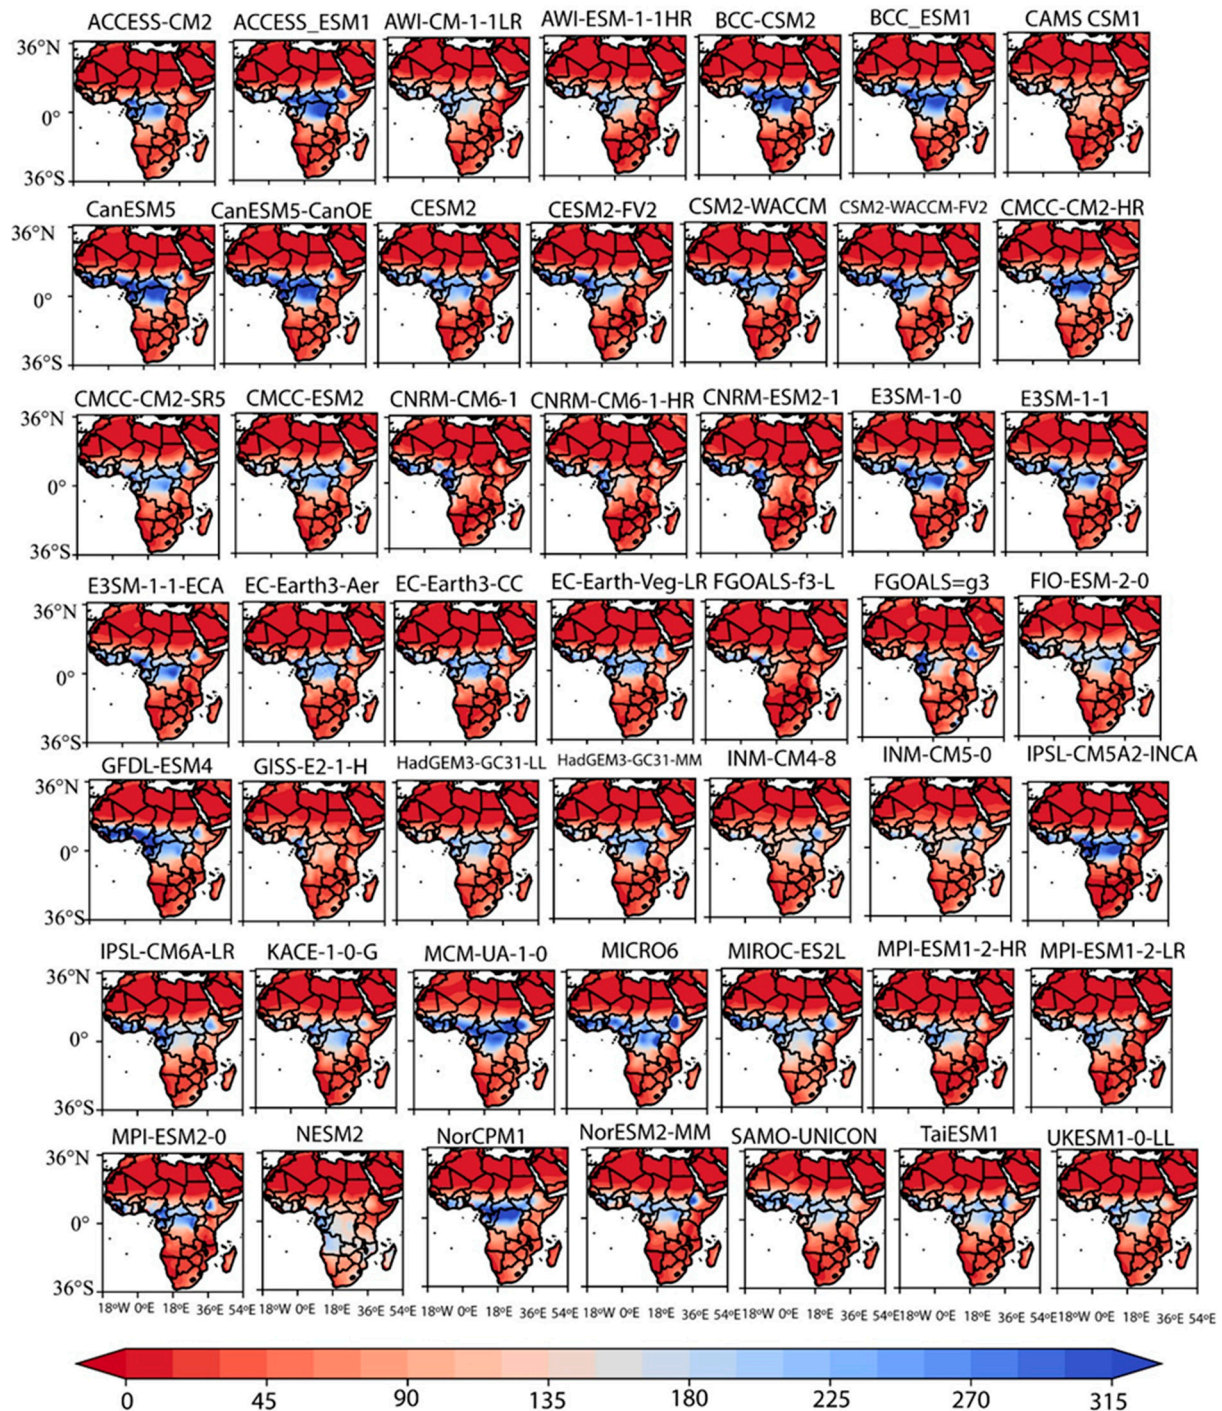

**Figure S1.** Spatial distribution of MJJASON mean precipitation in selected 49 during 1980-2014. The unit is mm year<sup>-1</sup>.

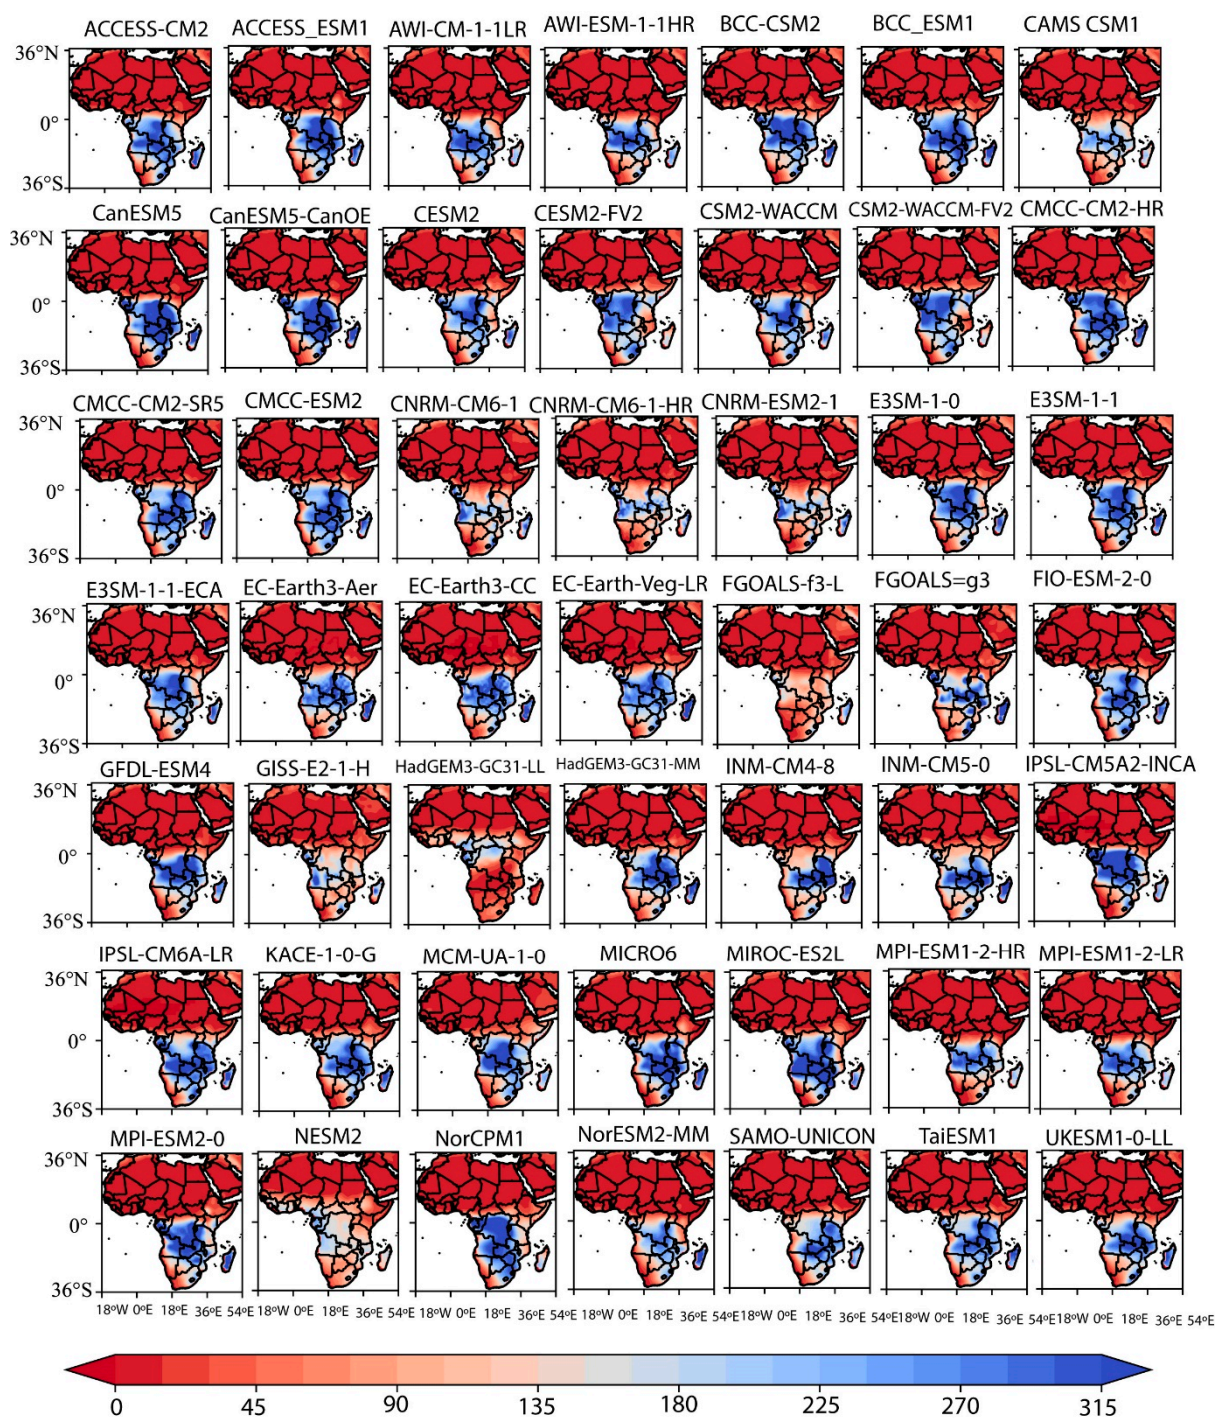

**Figure S2.** Spatial distribution of DEC mean precipitation in selected 49 during 1980-2014. The unit is  $\text{mm year}^{-1}$ .

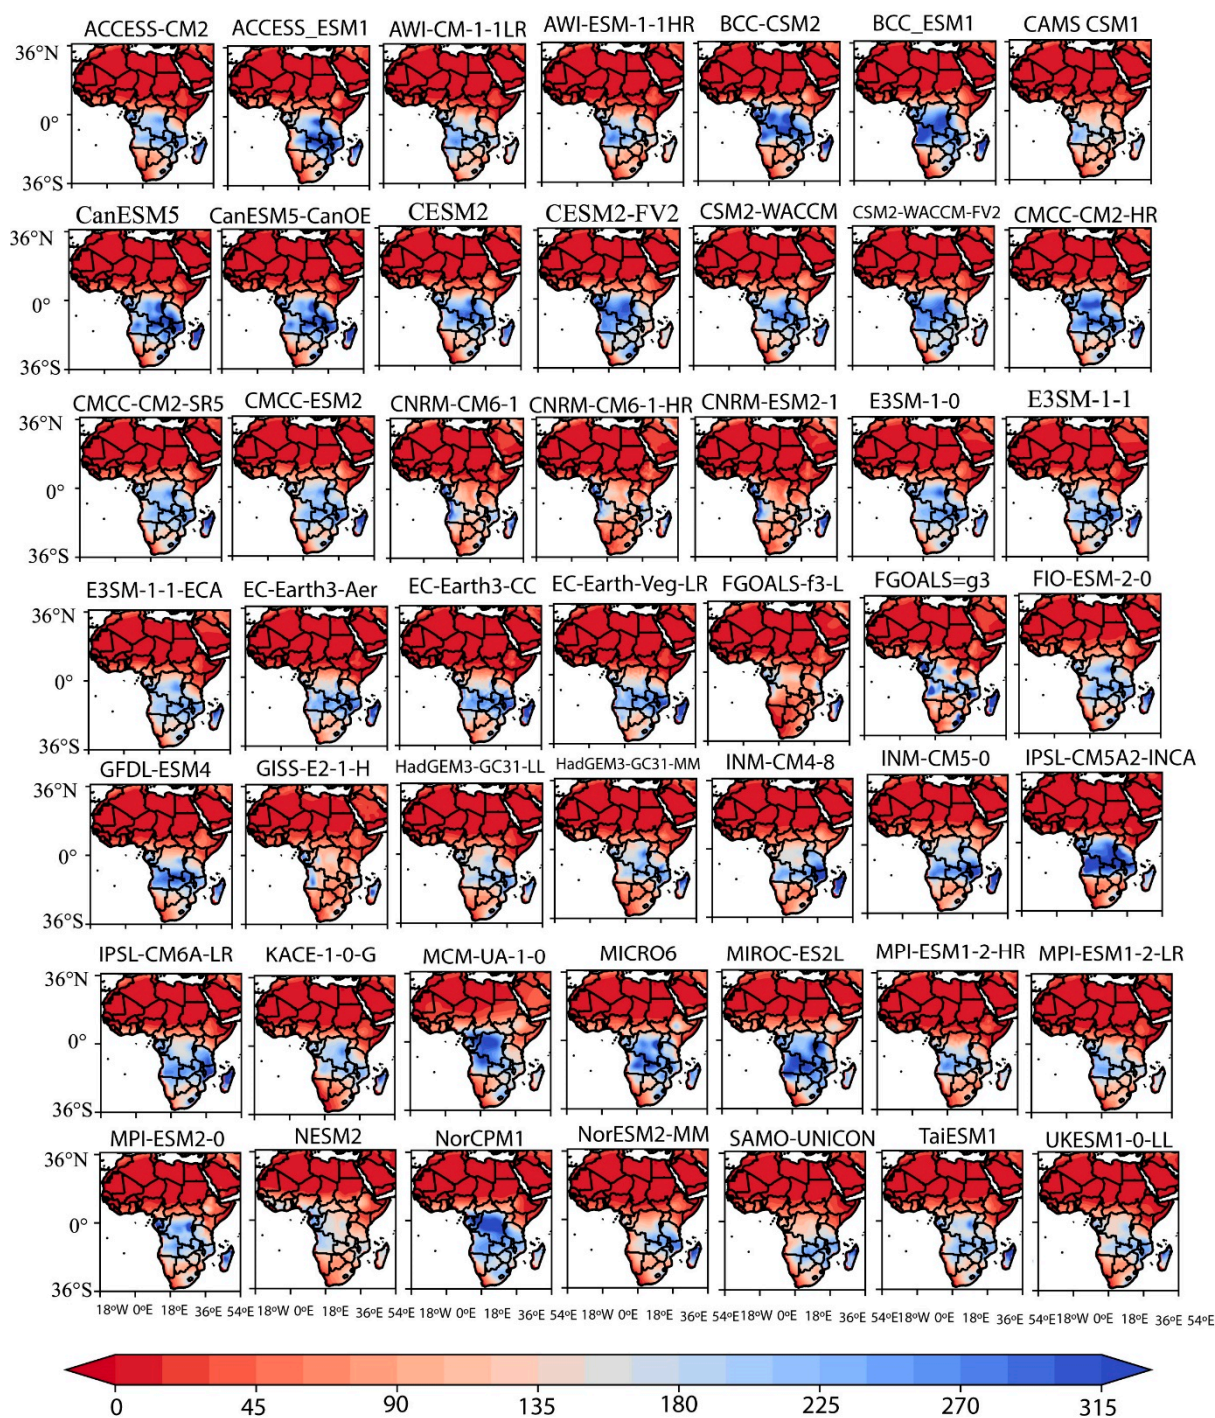

**Figure S3.** Spatial distribution of JFMA mean precipitation in selected 49 during 1980-2014 The unit is mm year<sup>-1</sup>.

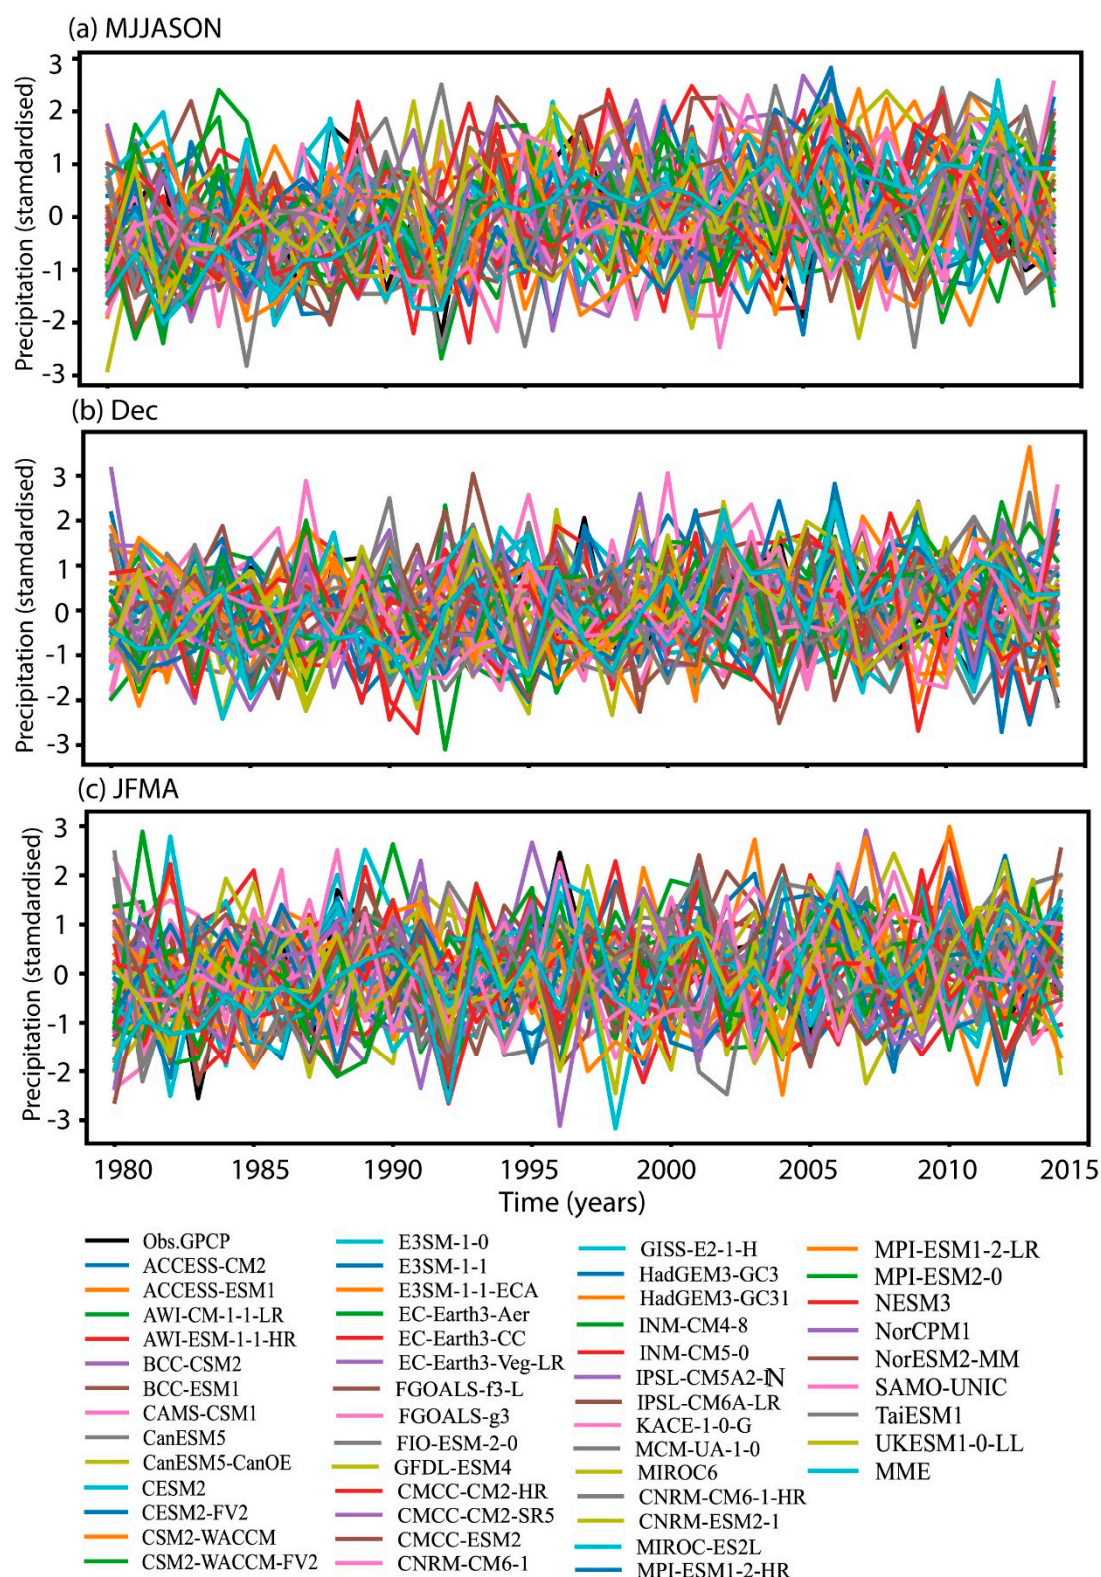

**Figure S4.** Seasonal variations of observation (i.e., GPCP, black line) CMIP6 MMM and 49 CMIP6-simulated precipitation anomalies during 1980 to 2014 across Africa and Arabian Peninsula. Anomalies are calculated with respect to the mean over the period.

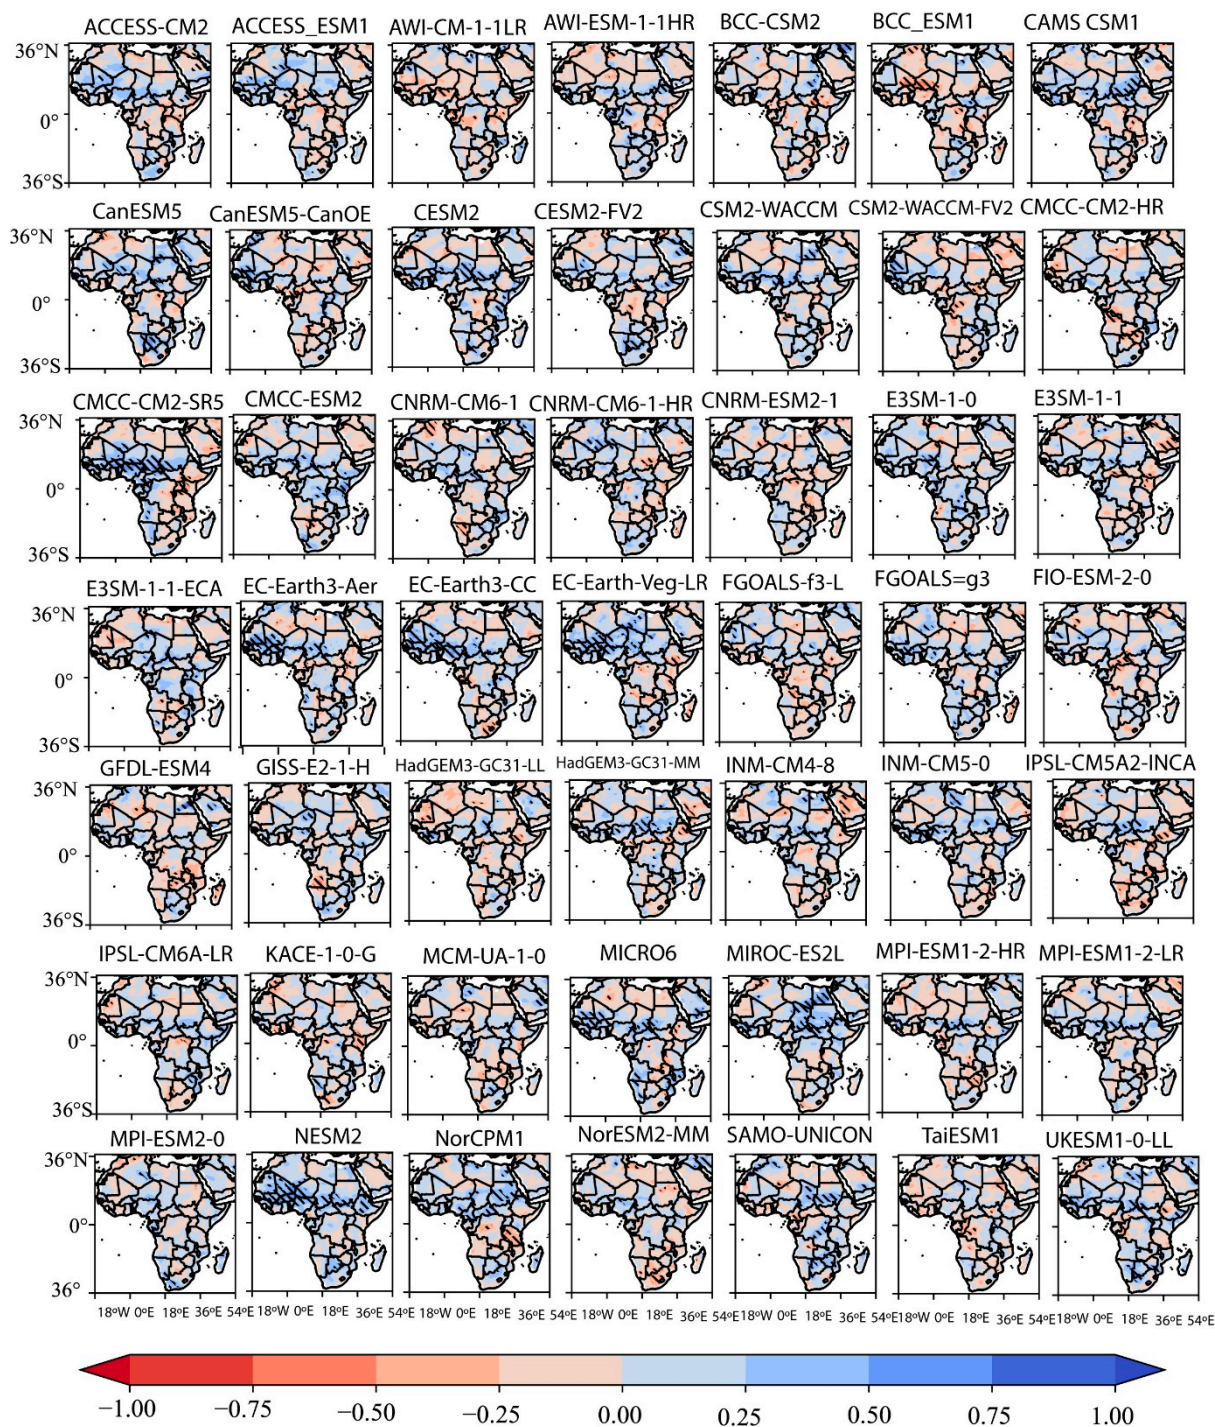

**Figure S5.** Spatial distributions of correlation coefficients of 49 selected CMIP6 models and SST during 1980-2014 at MJJASON. Hatched area indicates 95% confidence level.

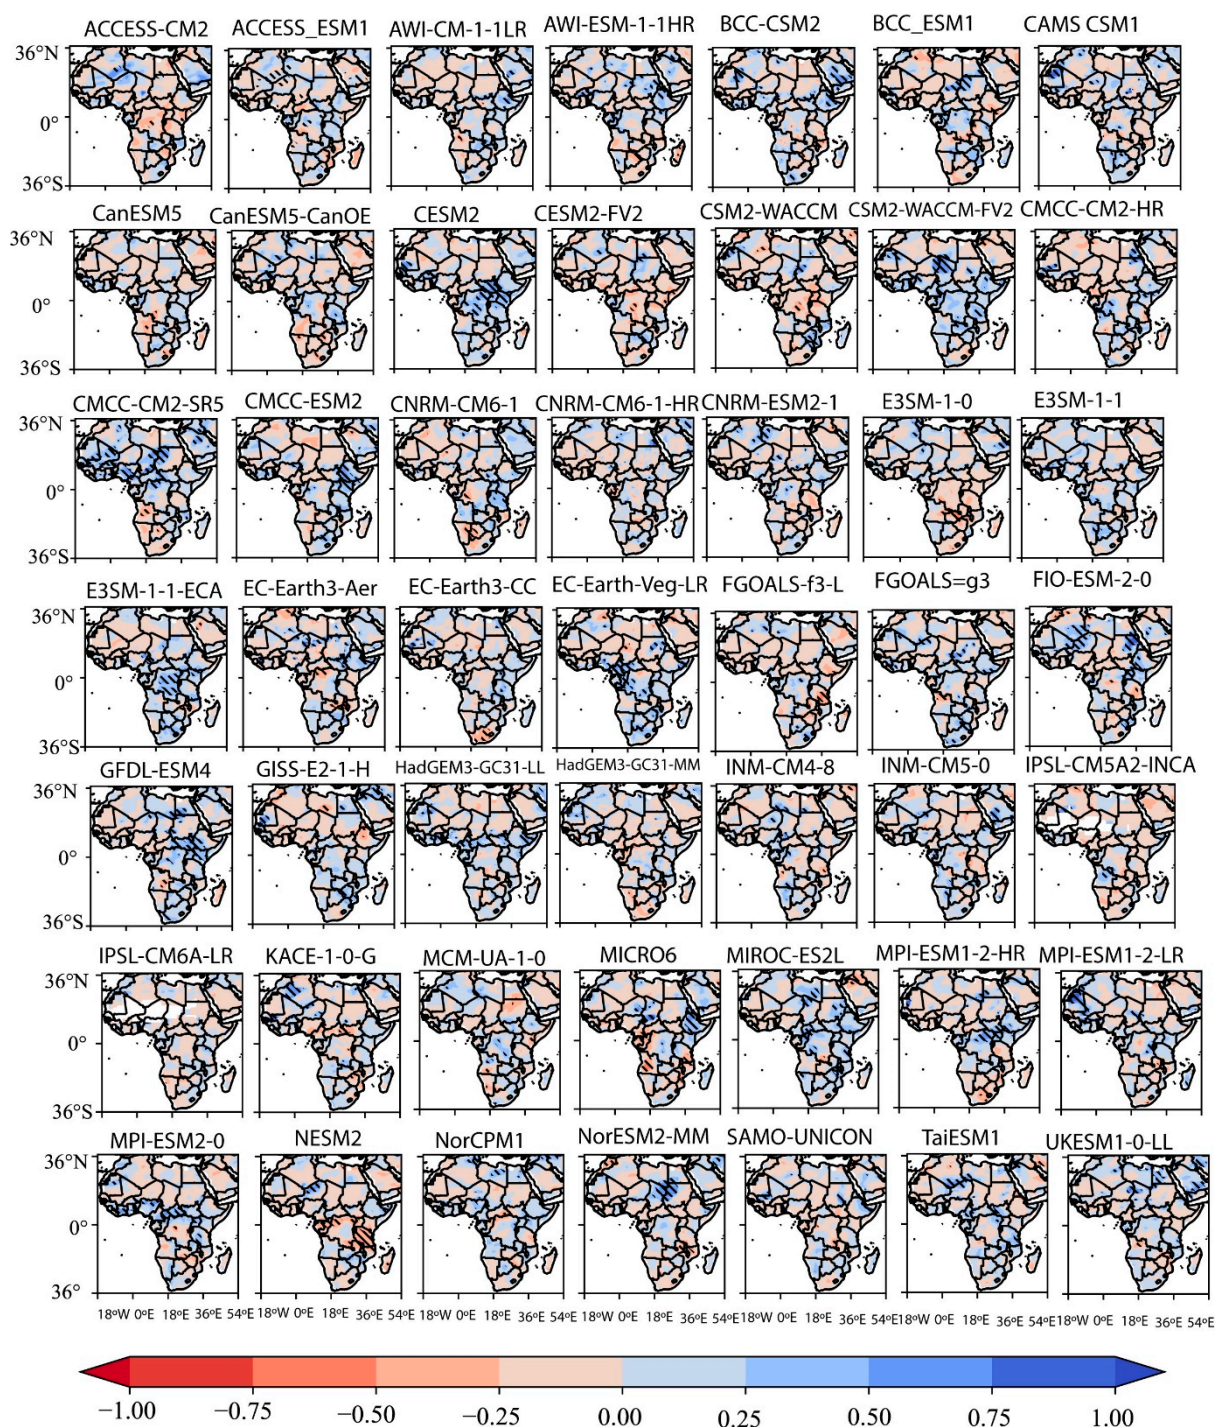

**Figure S6.** Spatial distributions of correlation coefficients of 49 selected CMIP6 models and SST during 1980-2014 at December. Hatched area indicates 95% confidence level.

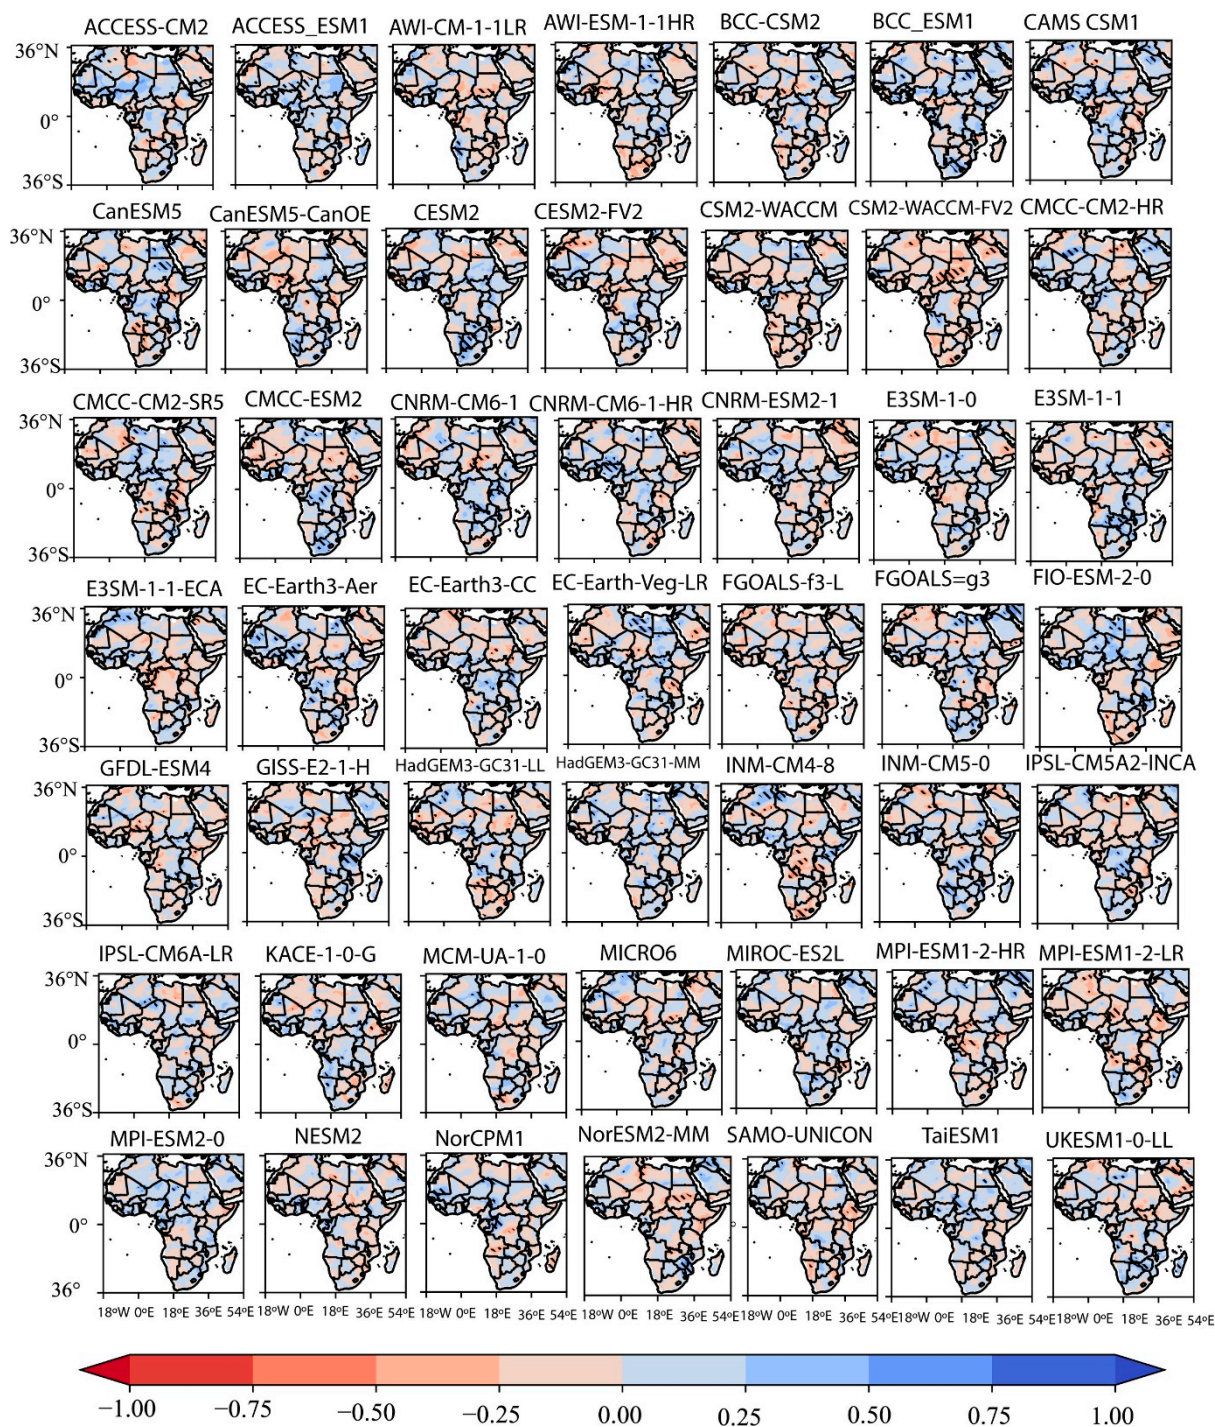

**Figure S7.** Spatial distributions of correlation coefficients of 49 selected CMIP6 models and SST during 1980-2014 at JFMA. Hatched area indicates 95% confidence level.

Table S1 Individual models at different temporal scales showing high degree of scattering (SD) higher than the CMIP6 MME.

| Models            | SD at annual | Models          | SD (MJJASON) | Models           | SD (JFMA) |
|-------------------|--------------|-----------------|--------------|------------------|-----------|
| E3SM-1-1          | 1.54         | MPI-ESM2-0      | 1.76         | E3SM-1-1-ECA     | 1.94      |
| INM-CM5-0         | 1.54         | IPSL-CM6A-LR    | 1.78         | E3SM-1-1         | 1.95      |
| FIO-ESM-2-0       | 1.56         | CMCC-CM2-SR5    | 1.79         | FIO-ESM-2-0      | 1.96      |
| KACE-1-0-G        | 1.56         | CESM2-FV2       | 1.81         | EC-Earth3—Aer    | 1.97      |
| TaiESM1           | 1.57         | CESM2           | 1.82         | INM-CM4-8        | 1.98      |
| CSM2-WACCM        | 1.59         | CSM2-WACCM      | 1.82         | MPI-EM2-0        | 1.98      |
| E3SM-1-1-ECA (1). | 1.59         | CSM2-WACCM-FV2  | 1.84         | EC-Earth3-CC     | 2.03      |
| CESM2             | 1.60         | E3SM-1-1ECA     | 1.80         | CSM2-WACCM       | 2.04      |
| FGOALS-g3 (),     | 1.60         | NESM3           | 1.87         | FGOALS-g3        | 2.04      |
| MPI-ESM2-0        | 1.61         | E3SM-1-0        | 1.88         | GFDL-ESM4        | 2.05      |
| CMCC-ESM2         | 1.65         | MICROC-ES2L     | 1.90         | CESM2            | 2.07      |
| E3SM-1-0          | 1.65         | CMCC-CM2-HR     | 2.01         | CMCC-CM2-SR5     | 2.08      |
| CMCC-CM2-SR5      | 1.66         | BCC-ESM1        | 2.05         | CMCC-ESM2        | 2.07      |
| NESM3             | 1.67         | NorCPM1         | 2.06         | E3SM-1-0         | 2.07      |
| CSM2-WACCM-FV2    | 1.67         | BCC-CSM2        | 2.09         | ACCESS-ESM1      | 2.17      |
| CESM2-FV2         | 1.7          | IPSL-CM5A2-INCA | 2.08         | INM-CM5-0        | 2.12      |
| IPSL-CM6A-LR      | 1.71         | ACCESS-ESM1     | 2.16         | EC-Earth3-Veg-LR | 2.07      |
| GFDL-ESM4         | 1.78         | GFDL-ESM4       | 2.23         | CSM2-WACCM-FV2   | 2.19      |
| ACCESS-ESM1       | 1.86         | CanESM5-CanOE   | 2.23         | CESM2-FV2        | 2.25      |
| CMCC-CM2-HR       | 1.87         | CanESM5         | 2.24         | CMCC-CM2-HR      | 2.27      |
| IPSL-CM5A2-INCA   | 1.91         | MCM-UA-1-0      | 2.31         | IPSL-CM6A-LR     | (2.27     |
| BCC-CSM2          | 1.93         |                 |              | NESM3            | 2.29      |
| BCC-ESM1          | 1.94         |                 |              | CanESM5-CanOE    | 2.30      |
| CanESM5-CanOE     | 1.94         |                 |              | BCC-CSM2         | 2.31      |
| MICRO-ES2L        | 1.96         |                 |              | CanESM5          | 2.37      |
| CanESM2           | 1.97         |                 |              | BCC-ESM1         | 2.39      |
| NorCMM1           | 2.04         |                 |              | NorCPM1          | 2.48      |
| MCM-UA-1-0        | 2.07         |                 |              | IPSL-CM5A2-INCA  | 2.53      |
|                   |              |                 |              | MCM-UA-1-0       | 2.26      |
|                   |              |                 |              | MICRO-ES2L       | 2.51      |

Table S2. Individual models at different temporal scales showing a low degree of scattering (SD) higher than the CMIP6 MME.

| Models           | Standard Deviation (SD) at MJJASON scale | Models          | Standard Deviation (SD) at JFMA scale |
|------------------|------------------------------------------|-----------------|---------------------------------------|
| EC-Earth3-Veg-LR | 1.65                                     | ACCESS-CM2      | 1.86                                  |
| KACE-1-0-G       | 1.63                                     | KACE-1-0-G      | 1.77                                  |
| EC-Earth3-Aer    | 1.63                                     | SAMO-UNICON     | 1.76                                  |
| FGOALS-g3        | 1.61                                     | AWI-CM-1-LR     | 1.76                                  |
| NorESM2-MM       | 1.60                                     | HadGEM3-GC31-LL | 1.69                                  |
| CNRM-CM6-CM6-1   | 1.59                                     | NorESM2-MM      | 1.69                                  |
| CNRM-ESM2-1      | 1.58                                     | UKESM1-0-LL     | 1.69                                  |
| HadGEM3-GC31-MM  | 1.58                                     | MPI-ESM1-2-LR   | 1.68                                  |

|                 |      |                 |      |
|-----------------|------|-----------------|------|
| ACCESS-CM2      | 1.56 | AWI-ESM-1-HR    | 1.66 |
| AWI-CM-1-1-LR   | 1.53 | CNRM-CM6-1      | 1.60 |
| UKESM1-0-LL     | 1.48 | CNRM-ESM2-1     | 1.54 |
| HadGEM3-GC31-LL | 1.47 | HadGEM3-GC31-MM | 1.54 |
| INM-CM4-8       | 1.46 | MPI-ESM1-2-HR   | 1.65 |
| MPI-ESM1-2-LR   | 1.47 | CNRM-CM6-1-HR   | 1.50 |
| MPI-ESM1-2-HR   | 1.46 | CAMS-CSM1       | 1.47 |
| ), AWI-ESM-1-HR | 1.45 | GISS-E2-1-H     | 1.32 |
| INM-CM5-0       | 1.43 | MICRO6          | 1.32 |
| CNRM-CM6-1-HR   | 1.42 | FGOALS-f3-L     | 1.22 |
| MIROC6          | 1.23 |                 |      |
| GISS-E2-1-H     | 1.23 |                 |      |
| CAMS-CSM1       | 1.17 |                 |      |
| FGOALS-f3-L     | 1.13 |                 |      |
